# Supplementary material for: The Role and Molecular Mechanism of SLC34A2 in Stemness Maintenance of CD44+CD166+ Lung Cancer Stem Cells (LCSCs) with AT-II cells’ characteristics
Source: Research Square preprint supplement (doi:10.21203/rs.3.rs-368100/v1), 2021-03-31
Supplement: Supplementary file 1 [file f10af3ea4297fb9e9eff6eaf.docx]

**Table S5. Tumorigenicity of LCSCs, their NC lentiviral knockdown (si-NC), and siRNA–SLC34A2 lentiviral knockdown (si-SLC34A2)**

| **Cells** | | **No. cell**  **per injection** | **No. tumors/**  **No. injection** |
| --- | --- | --- | --- |
|  | A549-LCSCs | 105 | 3/3 |
| A549-Si-NC | 105 | 3/3 |
| A549-Si-SLC34A2 | 105 | 3/3 |
| H460-LCSCs | 105 | 3/3 |
|  | H460-Si-NC | 105 | 3/3 |
| H460-Si-SLC34A2 | 105 | 3/3 |
