# Supplementary material for: The Role and Molecular Mechanism of SLC34A2 in Stemness Maintenance of CD44+CD166+ Lung Cancer Stem Cells (LCSCs) with AT-II cells’ characteristics
Source: Research Square preprint supplement (doi:10.21203/rs.3.rs-368100/v1), 2021-03-31
Supplement: Supplementary file 2 [file fa3613cfa28491bb288d2c39.docx]

**Table S3. Tumorigenicity of spheres derived from NSCLCs tissue and cell lines**

| **Cells** | **No. cell**  **per injection** | **No. tumors/**  **No. injection** | **Sites** | **P-value** |
| --- | --- | --- | --- | --- |
| A549 spheres | 105 | 4/4 | Left | **<0.01** |
| A549 | 106 | 0/4 | Right |  |
| H460 spheres | 105 | 4/4 | Left | **<0.01** |
| H460 | 106 | 0/4 | Right |  |
| H1299 spheres | 105 | 0/4 | Left | >0.05 |
| H1299 | 106 | 0/4 | Right |  |
| Tissue spheres | 105 | 4/4 | Left | **<0.01** |
| Differentiated tissue spheres | 106 | 0/4 | Right |  |
